# Supplementary material
Source: PubMed Central journal article supplement (PMC2844992)
Supplement: btq054_1.pdf [file btq054_1.pdf]

## Supplemental Text 1: Other Existing Tools for SRM Method Creation and Analysis

Proprietary software:

- Agilent MassHunter Workstation
- Applied Biosystems MRMPilot
- Applied Biosystems MultiQuant
- Thermo-Fisher PinPoint
- Waters TargetLynx
- Single Organism Mr. M (Sherwood *et al.*, 2009)

Freely available software:

- MaRiMba (Sherwood *et al.*, 2009) – Transition list creation
- MRMAid (Mead *et al.*, 2008) – Transition list creation
- MRMer (Martin *et al.*, 2008) – Result data viewing and peak integration
- TIQAM (Lange *et al.*, 2008) – Transition list creation

## Supplemental Text 2: Skyline Supported File Formats

Transition list output formats:

- Agilent
- Applied Biosystems
- Thermo Fisher Scientific
- Waters

Mass spectrometry data import formats:

- Agilent
- Applied Biosystems (with ProteinPilot 3.0 Trial Edition installed)  
<https://products.appliedbiosystems.com/ab/en/US/adirect/ab?cmd=catNavigate2&catID=601680&tab=DetailInfo>
- Thermo Fisher Scientific
- Waters (with MassLynx 4.1 installed)
- mzXML (Pedrioli *et al.*, 2004)
- mzML (Deutsch, 2008)

Publicly distributed spectral library formats:

- BiblioSpec (Frewen *et al.*, 2006)  
<http://proteome.gs.washington.edu/software/bibliospec/documentation/libs.html>
- Global Proteome Machine (GPM), X! Hunter (Craig *et al.*, 2006)  
<ftp://ftp.thegpm.org/projects/xhunter/libs/>
- National Institute of Standards and Technology (NIST) (Toner, 2008)  
<http://peptide.nist.gov/>
- SpectraST (Lam *et al.*, 2007)  
<http://www.peptideatlas.org/specplib/>

Peptide search engine result formats for building spectral libraries:

- Mascot (Perkins *et al.*, 1999)
- IDPicker (Ma *et al.*, 2009)
- Trans Proteomic Pipeline (Keller *et al.*, 2005)  
pepXML and mzXML (Pedrioli *et al.*, 2004)
- X! Tandem (Craig *et al.*, 2004)

## References

- Craig,R. and Beavis, R.C. (2004) TANDEM: matching proteins with tandem mass spectra. *Bioinformatics* **20**, 1466-1467.
- Craig,R. *et al.* (2006) Using Annotated Peptide Mass Spectrum Libraries for Protein Identification. *Journal of Proteome Research* **5** (8), 1843-1849
- Deutsch,E. (2008) mzML: A single, unifying data format for mass spectrometer output. *Proteomics* **8** (14), 2776-2777
- Frewen,B.E. *et al.* (2006) Analysis of peptide MS/MS spectra from large-scale proteomics experiments using spectrum libraries. *Anal. Chem.*, **78** (16):5678-84
- Keller,A. *et al.* (2005) A uniform proteomics MS/MS analysis platform utilizing open XML file formats. *Mol. Syst. Biol.*, **1**, 1-8.
- Lam,H. *et al.* (2007) Development and validation of a spectral library searching method for peptide identification from MS/MS. *Proteomics* **7**, 655-667
- Lange,V *et al.* (2008) Targeted quantitative analysis of Streptococcus pyogenes virulence factors by multiple reaction monitoring. *Mol. Cell. Proteomics* **7**:1489-1500
- Ma,Z.Q. *et al.* (2009) IDPicker 2.0: Improved protein assembly with high discrimination peptide identification filtering. *J. Proteome Res.* **8**(8):3872-81
- Martin,D *et al.* (2008) MRMer, an Interactive Open Source and Cross-platform System for Data Extraction and Visualization of Multiple Reaction Monitoring Experiments. *Mol. Cell. Proteomics* **7**:2270-2278
- Mead,J *et al.* (2008) MRMaid: the web-based tool for designing multiple reaction monitoring (MRM) transitions. *Mol. Cell. Proteomics* **8**:696-705
- Pedrioli,P.G. *et al.* (2004) A common open representation of mass spectrometry data and its application to proteomics research. *Nat. Biotechnol.*, **22**, 1459-1466.
- Perkins,D.N. *et al.* (1999) Probability-based protein identification by searching sequence databases using mass spectrometry data. *Electrophoresis* **20**, 3551-3567
- Sherwood,C *et al.* (2009) Rapid optimization of MRM-MS instrument parameters by subtle alteration of precursor and product m/z targets. *J. Proteome Res.* **8** (7):3746-51.
- Sherwood,C *et al.* (2009) MaRiMba: A Software Application for Spectral Library-Based MRM Transition List Assembly. *J. Proteome Res.* **8** (10), pp 4396-4405
- Toner,B. (2008) NIST Team Building Peptide Spectral Library To Improve Mass-Spec Proteomics Analysis. *Bioinform*

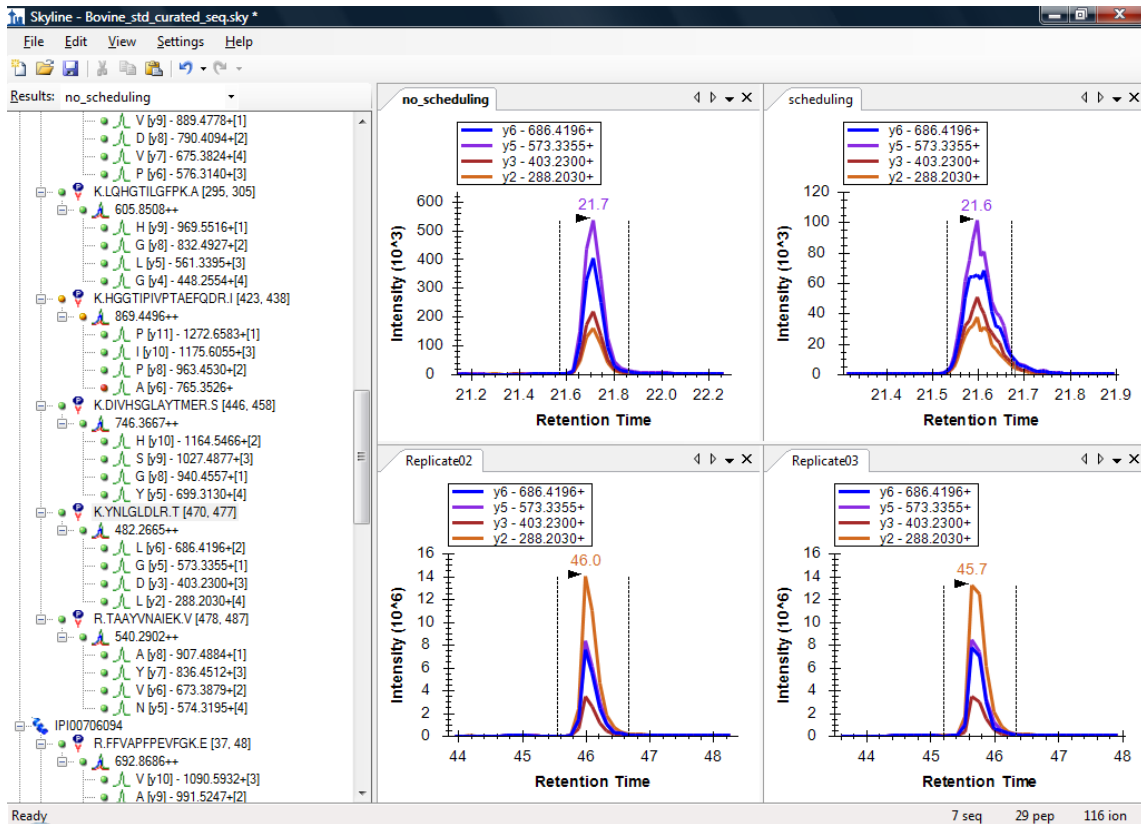

**Supplemental Figure 1.** Vendor neutral data sharing support in Skyline. This support is illustrated using data acquired for a single set of peptides and transitions on an Applied Biosystems 4000 Q Trap in the top 2 panes, with data acquired on a Thermo-Fisher Scientific TSQ-Quantum Ultra in the bottom 2 panes. In this example, the investigator can clearly see the change in ion ratios between the two instruments.

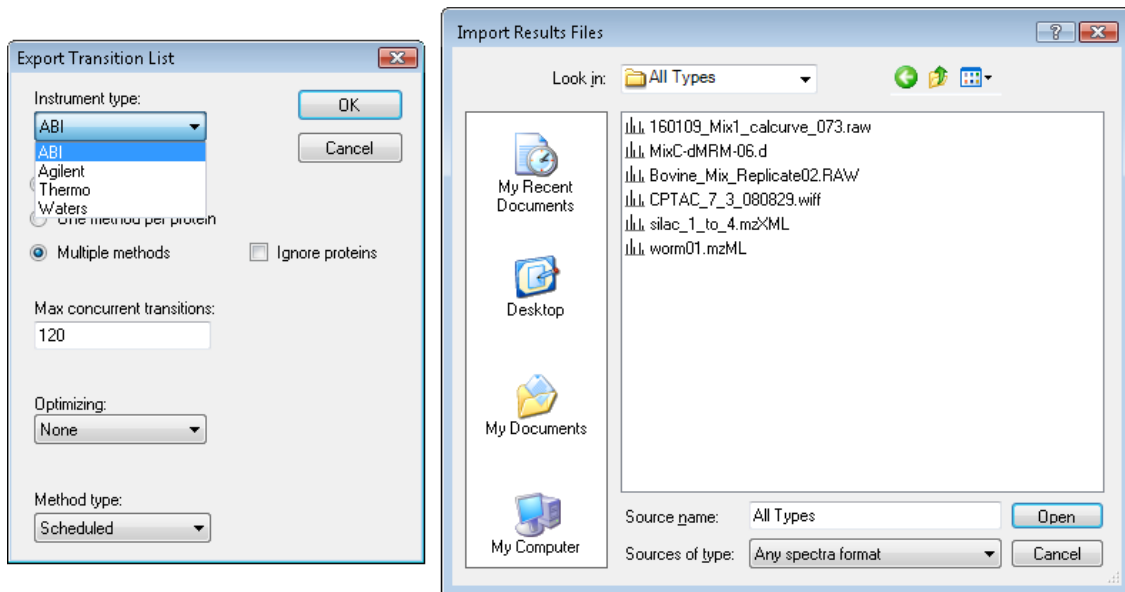

**Supplemental Figure 2.** The Export Transition List and Import Results Files dialogs in Skyline. These dialogs show the full range of SRM instrument support options available only in Skyline. Here the Export Transition List dialog shows support for creating transition lists ready for use on Agilent, Applied Biosystems, Thermo-Fisher Scientific and Waters instrument. Additionally, the Import Results Files dialog shows support for importing the native files from these instruments as well as the portable mzML and mzXML formats.

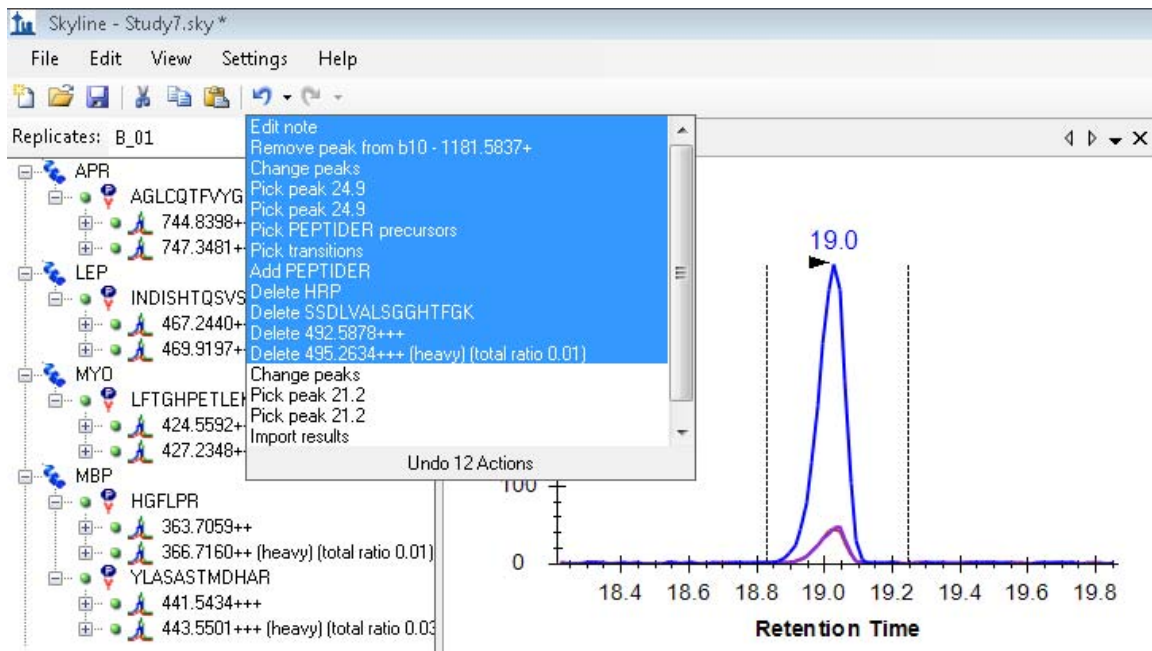

**Supplemental Figure 3.** Skyline shows the full history of actions performed on this document in its undo list. This full history enables the document to be restored to any state in the editing session at a single mouse click.

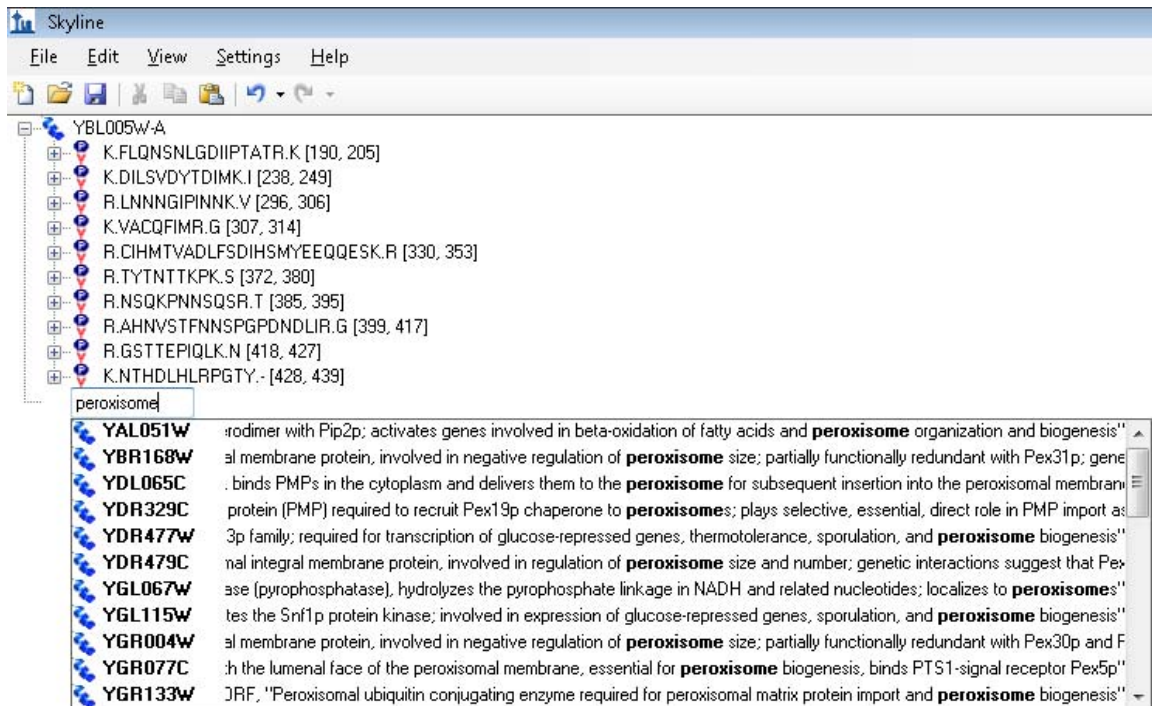

**Supplemental Figure 4.** Screenshot showing the auto-completion capability in Skyline. As an example, when the user types the word "peroxisome" any of yeast proteins from the Background Proteome containing that word in the description can be added to the document by simply selecting it from a list. Skyline also offers auto-completion against the Background Proteome for peptide sequences and protein accession numbers.

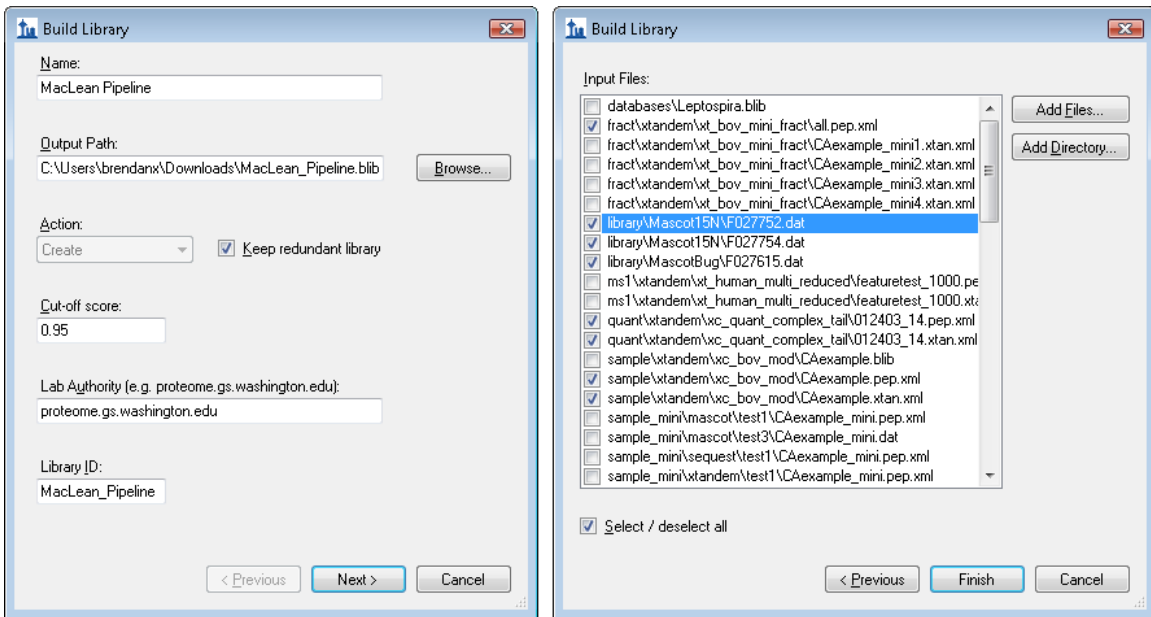

**Supplemental Figure 5.** The Skyline library build wizard simplifies the creation BiblioSpec MS/MS spectral libraries from experimental peptide search results. Support for a variety of formats is shown with a complete list supplied in Supplemental Text 1.

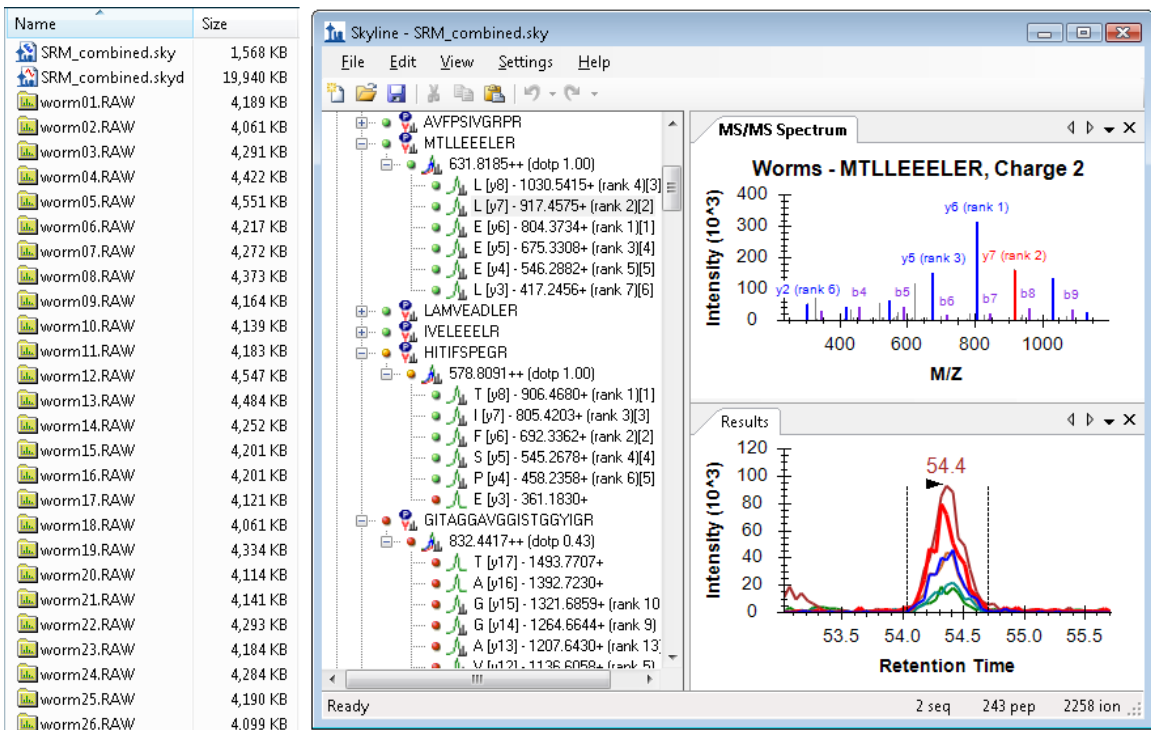

**Supplemental Figure 6.** The Skyline high-performance data file can handle very large experiments without loss in performance. Experiments requiring over 50 individual native instrument files can be stored efficiently in a single file, often at a fraction of the size of the instrument native files. This figure shows 26 of the 55 instrument files from a TSQ-Quantum Ultra required to measure the original 2908 transitions in this document. The resulting SRM\_combined.skyd Skyline data file, requiring 1/10<sup>th</sup> the disk space of the original RAW files, is shown above. Once the import is complete, this file can be easily shared with collaborators and opened in a fraction of a second without the native instrument files.

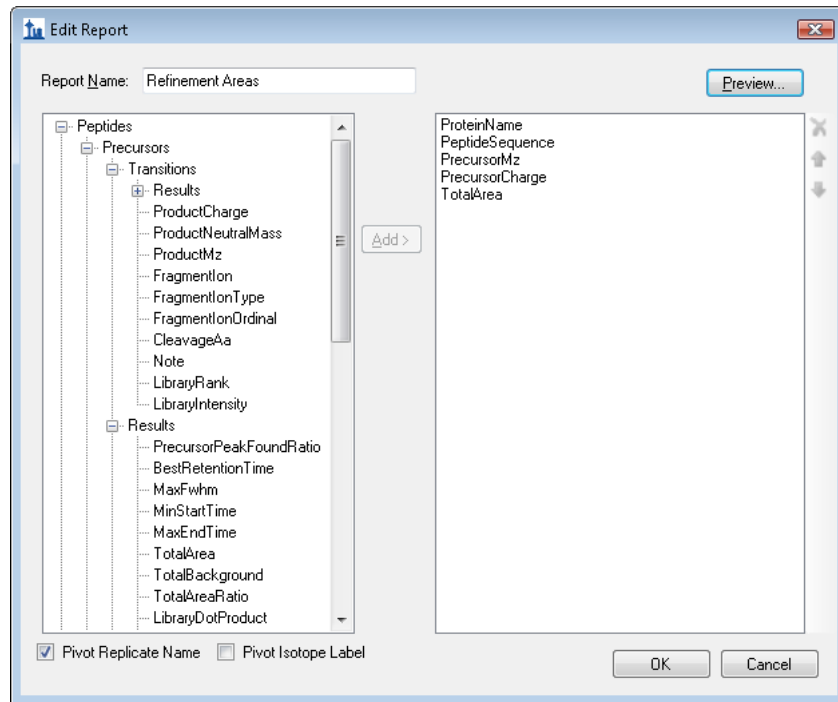

| ProteinName        | PeptideSequence | PrecursorMz | PrecursorCharge | 102_REP1 TotalArea | 102_REP2 TotalArea | 102_REP3 TotalArea | 103_REP1 TotalArea | 103_REP2 TotalArea | 103_REP3 TotalArea | 108_REP1 TotalArea |
|--------------------|-----------------|-------------|-----------------|--------------------|--------------------|--------------------|--------------------|--------------------|--------------------|--------------------|
| IPH:IP100231736... | GILAADESVGS...  | 674.842484  | 2               | 18595              | 22514              | 14353              | 12133              | 2636               | 8298               | 2529               |
| IPH:IP100231736... | CSLPRPWALTF...  | 905.956506  | 2               | 57186              | 40550              | 37921              | 24490              | 22618              | 4180               | 44041              |
| IPH:IP100327469... | LGGEVSVACK      | 574.784438  | 2               | 19631              | 15293              | 11683              | 18984              | 11676              | 7772               | 31807              |
| IPH:IP100327469... | YGQPGDAGAAG...  | 923.965059  | 2               | 4234115            | 2923049            | 2760665            | 2786959            | 2111084            | 1944862            | 4798247            |
| IPH:IP100209744... | GSYNLQDLAQ...   | 710.875173  | 2               | 42075              | 36186              | 34892              | 14334              | 13398              | 5709               | 23758              |
| IPH:IP100372372... | DIPVNPICIYR     | 689.336315  | 2               | 1460               | 5727               | 882                | 1090               | 78                 | 1033               | 849                |
| IPH:IP100372372... | LQPLDFK         | 430.747453  | 2               | 1696305            | 1204367            | 1328984            | 642230             | 478379             | 544093             | 773044             |
| IPH:IP100372372... | SQLPGIAEGR      | 570.822212  | 2               | 101630             | 93094              | 77583              | 33321              | 28998              | 31786              | 38163              |
| IPH:IP100197703... | DFATVYVDAVK     | 614.316428  | 2               | 722875             | 601897             | 572850             | 1858199            | 1514414            | 71595              | 2427363            |
| IPH:IP100197703... | DYV5QFESSTLGK   | 730.848821  | 2               | 330468             | 265428             | 240715             | 615321             | 570887             | 52172              | 879804             |
| IPH:IP100197703... | FGLYSQDMR       | 558.760766  | 2               | 36555              | 24330              | 19711              | 14828              | 25501              | 11641              | 32280              |
| IPH:IP100197700... | TGTNLMDFLSR     | 627.810987  | 2               | 113251             | 74905              | 93308              | 80341              | 70503              | 244                | 84821              |
| IPH:IP100197700... | LMSPEEKPAAPAK   | 684.86322   | 2               | 141215             | 103027             | 66785              | 113399             | 84342              | 66568              | 131826             |
| IPH:IP100204118... | LNDG5QITFEK     | 626.314417  | 2               | 1834               | 14307              | 13471              | 37658              | 34172              | 3485               | 58471              |
| IPH:IP100204118... | ATAQDNPK        | 422.711599  | 2               | 479258             | 7905               | 72653              | 1087070            | 684542             | 180099             | 726931             |
| IPH:IP100454534... | GTIT5IAALDDPK   | 651.350999  | 2               | 76283              | 68356              | 56940              | 48345              | 56241              | 2692               | 64265              |
| IPH:IP100454534... | TQTPVQGCHLE...  | 924.954691  | 2               | 129958             | 96878              | 86189              | 80725              | 64560              | 67880              | 145435             |
| IPH:IP100454534... | IFPENNIK        | 487.768917  | 2               | 644557             | 540802             | 493485             | 196435             | 162621             | 349                | 200994             |
| IPH:IP100198667... | SLLSLEEAK       | 552.300778  | 2               | 1394596            | 1216738            | 1161751            | 1220653            | 1096191            | 1005717            | 1787356            |
| IPH:IP100198667... | ASGDIILGDR      | 669.246791  | 2               | 192350             | 159457             | 140967             | 135746             | 129425             | 12102              | 192540             |

**Supplemental Figure 7.** The Skyline custom report designer helps users quickly export data into tabular formats compatible with Excel and R. The report shown supplies total peptide area for all peptides measured pivoted on the replicate name. This format greatly simplifies using Excel to perform statistical tests for significant change in peptide abundance between replicates from cases and controls.
